# Supplementary material for: Intra-abdominal hypertension and the abdominal compartment syndrome: updated consensus definitions and clinical practice guidelines from the World Society of the Abdominal Compartment Syndrome
Source: PubMed Central journal article supplement — Intensive Care Med. 2013 May 15;39(7):1190–206. doi: 10.1007/s00134-013-2906-z (PMC3680657; doi:10.1007/s00134-013-2906-z), 2013-05-15

## Fluid balance and survivorship

Summary of studies looking at cumulative fluid balance after 1 week of ICU stay in survivors versus non-survivors.

|                           | Cum FB Survivors | FB SD  | n      | FB Non-survivors | FB SD  | N      | Delta FB |
|---------------------------|------------------|--------|--------|------------------|--------|--------|----------|
| <b>Alsous 2000</b>        | 50               | 400    | 16     | 2400             | 1700   | 20     | -2350    |
| <b>Cordemans 2012</b>     | 3419             | 7842   | 70     | 6982             | 9875   | 44     | -3563    |
| <b>Cordemans 2012</b>     | 4971             | 7737   | 58     | 9503             | 6910   | 65     | -4532    |
| <b>Goldstein 2005</b>     | 457              | 403    | 60     | 805              | 858    | 56     | -348     |
| <b>Kuzkov 2006</b>        | 893              | 668    | 16     | 1782             | 750    | 15     | -889     |
| <b>Malbrain 2005</b>      | 1643             | 1500   | 192    | 6214             | 2143   | 73     | -4571    |
| <b>Malbrain 2011</b>      | 3862             | 6904   | 314    | 5994             | 7546   | 413    | -2132    |
| <b>Murphy 2009</b>        | 9250             | 625    | 125    | 15875            | 1125   | 87     | -6625    |
| <b>Rosenberg 2009</b>     | 5154             | 769    | 159    | 10308            | 1923   | 635    | -5154    |
| <b>Schuller 1991</b>      | 250              | 1600   | 43     | 2000             | 2800   | 26     | -1750    |
| <b>Shum 2011</b>          | 880              | 2320   | 505    | 5410             | 5050   | 134    | -4530    |
| <b>Simmons 1986</b>       | 7500             | 4090   | 11     | 17220            | 2045   | 26     | -9720    |
| <b>Vidal 2008</b>         | 2100             | 3900   | 34     | 16100            | 6400   | 49     | -14000   |
| <b>mean Fluid Balance</b> | 3109,9           | 2981,4 | 1603,0 | 7737,9           | 3778,8 | 1643,0 | -4628,0  |
| <b>Standard Deviation</b> | 2928,5           | 2848,3 |        | 5716,0           | 3011,1 |        | 3777,0   |

**Forest plot looking at Cumulative fluid balance after 1 week of ICU stay in (non)survivors**

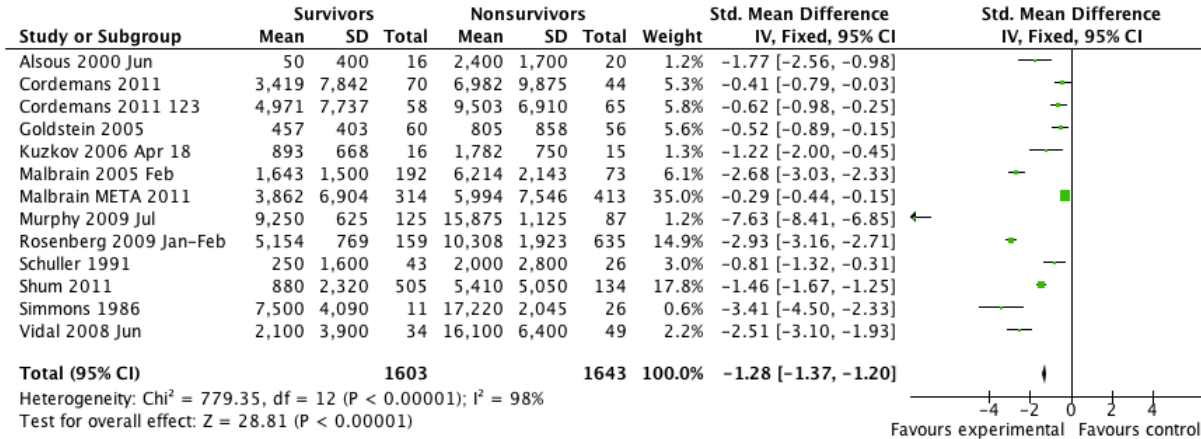

Supplement: 134_2013_2906_MOESM35_ESM.pdf [file 134_2013_2906_MOESM35_ESM.pdf]
