# Supplementary material for: Intra-abdominal hypertension and the abdominal compartment syndrome: updated consensus definitions and clinical practice guidelines from the World Society of the Abdominal Compartment Syndrome
Source: Springer Nature journal article supplement (doi:10.1007/s00134-013-2906-z), 2013-05-14
Supplement: MOESM10 [file 8122336]

**Supplement 10 Should We Treat or Prevent IAH?**

IAH has consistently been reported to associate with morbidity and mortality. However, it remains uncertain as to whether treating or preventing this condition improves outcomes.

**Evidence Summary:**

We found no RCTs or meta-analyses that provided data relevant to this question. The best available data derives from a single prospective cohort study [[[1](#_ENREF_1)]] that compared the outcomes of 478 consecutive open abdomen patients managed using the 2006 WSACS definitions [[[2](#_ENREF_2)]] as well as an *a priori* evidence-based management algorithm [[[3](#_ENREF_3)]]. As compared to historical controls managed according to standards of care for that time, IAH and ACS management was associated with a significantly increased adjusted survival to hospital discharge, an increased proportion of patients achieving same-admission primary abdominal fascial closure (59% versus 81%), and decreased resource utilization [[[1](#_ENREF_1)]]. Further evidence assessed to be of low quality was also identified in our review of the literature [[[4-8](#_ENREF_4)]]

**Recommendation:**

**Efforts and/or protocols be utilized to avoid sustained IAH are RECOMMENDED, versus inattention to the IAP in critically ill patients (Management Recommendation 4; GRADE 1C).**

**Rationale for Recommendation:**

The WSACS panel initially suggested that efforts and/or protocols be utilized to maintain IAP less than 20 mmHg. However, after deliberation, the recommendation was reworded to state that the focus should be on preventing IAH in general, rather than focusing on any one arbitary threshold level of IAP. The quality of evidence rating was influenced by the large observed effect size and inherent biological rationale of the above described observational study [[[1](#_ENREF_1)]].

**References**

1. Cheatham ML, Safcsak K, (2010) Is the evolving management of intra-abdominal hypertension and abdominal compartment syndrome improving survival? Crit Care Med 38: 402-407

2. Malbrain ML, Cheatham ML, Kirkpatrick A, Sugrue M, Parr M, De Waele J, Balogh Z, Leppaniemi A, Olvera C, Ivatury R, D'Amours S, Wendon J, Hillman K, Johansson K, Kolkman K, Wilmer A, (2006) Results from the International Conference of Experts on Intra-abdominal Hypertension and Abdominal Compartment Syndrome. I. Definitions. Intensive Care Med 32: 1722-1732

3. Cheatham ML, Malbrain ML, Kirkpatrick A, Sugrue M, Parr M, De Waele J, Balogh Z, Leppaniemi A, Olvera C, Ivatury R, D'Amours S, Wendon J, Hillman K, Wilmer A, (2007) Results from the International Conference of Experts on Intra-abdominal Hypertension and Abdominal Compartment Syndrome. II. Recommendations. Intensive Care Med 33: 951-962

4. Ivatury RR, Porter JM, Simon RJ, Islam S, Ranjit J, Stahl WM, (1998) Intra-abdominal hypertension after life-threatening penetrating abdominal trauma: prophylaxis, incidence, and clinical relevance to gastric mucosal pH and abdominal compartment syndrome. J Trauma 44: 1016-1023

5. Vidal MG, Ruiz Weisser J, Gonzalez F, Toro MA, Loudet C, Balasini C, Canales H, Reina R, Estenssoro E, (2008) Incidence and clinical effects of intra-abdominal hypertension in critically ill patients. Critical care medicine 36: 1823-1831

6. Malbrain ML, Chiumello D, Pelosi P, Wilmer A, N. B, Malcagni V, Bihari D, Innes R, Cohen J, Singer P, Japiassu A, Hurtop E, De Keulenauer BL, Daelemans R, Del Turco M, Cosimini P, Ranieri M, Jacquet L, Laterre PF, Gattinoni L, (2004) Prevalence of intra-abdominal hypertension in critically ill patients: a multicentre epidemiological study. Intensive Care Med 30: 822-829

7. Malbrain ML, Chiumello D, Pelosi P, Bihari D, Innes R, Ranieri VM, Del Turco M, Wilmer A, Brienza N, Malcangi V, Cohen J, Japiassu A, Keulenaer BL, Daelemans R, Jacquet L, Laterre PF, Frank G, de Souza P, Cesana B, Gattinoni L, (2005) Incidence and prognosis of intraabdominal hypertension in a mixed population of critically ill patients: a multi-center epidemiological study. Crit Care Med 33: 315-322

8. Regueira T, Hasbun P, Rebolledo R, Galindo J, Aguirre M, Romero C, Castillo L, Bugedo G, Hernandez G, (2007) Intraabdominal hypertension in patients with septic shock. Am Surg 73: 865-870
