# Supplementary material for: Intra-abdominal hypertension and the abdominal compartment syndrome: updated consensus definitions and clinical practice guidelines from the World Society of the Abdominal Compartment Syndrome
Source: Springer Nature journal article supplement (doi:10.1007/s00134-013-2906-z), 2013-05-14
Supplement: MOESM31 [file 8122336]

## **Appendix Systematic Review Topics and Team Composition**

**Committee Chair:** Dr Andrew W Kirkpatrick, Calgary, Alberta

**Methodological Advisors:** Dr Roman Jaeschke, Hamilton, Ontario

Dr Gordon Guyatt, Hamilton, Ontario

Dr Derek Robertson, Calgary, Alberta

**Committee Research Assistant:** Mr Dieter Deberg, Ghent, Belgium

**Question 1) Does measuring IAP improve outcome?**

Co-Chair – Dr. Juan Duchesne, United States of America

Co-Chair – Dr Ted Kimball, United States of America

**Question 2) Does AP-based resuscitation change outcome?**

Chair – Dr Bart De Keulenaer, Australia

Team-members – Dr. Michael Cheatham, United States of America

- Dr . Manu Malbrain, Belgium

**Question 3) Does maintenance of IAP < 20 mmHg improve outcome?**

Chair – Dr Michael Cheatham, United States of America

Team-members – Dr Manu Malbrain, Belgium

- Dr Claudia Olivera, Mexico

- Dr. Rao Ivatury, United States of America

**Question 4) Does percutaneous drainage improve outcome?**

Chair – Dr Andrew Kirkpatrick, Canada

Team-members – Dr Bart De Keulenaer, Australia

- Dr JF Ouellet, Canada

- Dr Chad Ball, Canada

**Question 5) Does decompressive laparotomy improve outcome**

Chair – Dr Jan De Waele, Belgium

Team-Members – Dr Joel Starkopf, Belgium

- Dr Rao Ivatury, United States of America

- Dr Scott D'Amours, Australia

**Question 6) Which patients benefit from a prophylactic open abdomen?**

Chair – Dr Rao Ivatury, United States of America

Team-members – Dr Michael Sugrue, Ireland

- Dr Zsolt Balogh, Australia

**Question 7) Does early abdominal closure change outcome?**

Chair – Dr Michael Sugrue, Ireland

Team-members – Dr Martin Bjorck, Sweden

- Dr Jan De Waele, Belgium

**Question 8) Does VAC therapy improve outcome?**

Chair – Dr Derek Roberts, Canada

Team-members – Dr Andrew Kirkpatrick, Canada

- Dr Scott D'Amours, Australia

- Dr Chad Ball, Canada

**Question 9) Do bioprosthetic meshes and early abdominal closure change outcome?**

Chair – Dr Chad Ball, Canada

Team-members – Dr Scott D'Amour, Australia

- Dr Michael Cheatham, United States of America

**Question 10) Does component parts separation change outcome?**

Chair – Dr Ari Leppaniemi, Finland

Team-members – Michael Sugrue, Ireland

- Dr Martin Bjorck, Sweden

**Question 11) Does a negative fluid balance improve outcome?**

Chair – Dr Manu Malbrain, Belgium

Team-members – Dr Bart De Keulenaer, Australia

- Dr Martin Bjorck

**Question 12) Does a massive transfusion policy change outcome?**

Chair – Dr Zsolt Balogh, Australia

Team-members – Dr Annika Reintam, Estonia

- Dr Jan De Waele, Belgium

- Dr Chad Ball, Canada
