# Supplementary material for: Intra-abdominal hypertension and the abdominal compartment syndrome: updated consensus definitions and clinical practice guidelines from the World Society of the Abdominal Compartment Syndrome
Source: Springer Nature journal article supplement (doi:10.1007/s00134-013-2906-z), 2013-05-14
Supplement: MOESM32 [file 8122336]

## Appendix A-2

### GRADE Voting Details of the WSACS GRADE Process

#### Management Questions and Recommendations

---

##### Recommendation 1

**“Measure IAP when any known risk factor is present in a critically ill/injured patient”**

##### **STRONG RECOMMENDATION**

###### Voting Details

| Recommend do | suggest do | neutral | suggest not | recommend not | votes |
|--------------|------------|---------|-------------|---------------|-------|
| 16           | 0          | 0       | 0           | 0             | 16    |

---

##### Recommendation 2

**“Studies in this area adopt the standard IAP measurement technique”**

##### **STRONG RECOMMENDATION**

###### Voting Details

| Recommend do | suggest do | neutral | suggest not | recommend not | votes |
|--------------|------------|---------|-------------|---------------|-------|
| 16           | 0          | 0       | 0           | 0             | 0     |

---

##### Recommendation 3

**“Use a protocolized monitoring and management strategy for managing intra-abdominal pressure versus none.”**

##### **STRONG RECOMMENDATION**

###### Voting Details

| Recommend do | suggest do | neutral | suggest not | recommend not | votes |
|--------------|------------|---------|-------------|---------------|-------|
| 13           | 3          | 0       | 0           | 0             | 16    |

---

### Potential Recommendation

**“Use of the APP to guide resuscitation versus not.”**

**NO RECOMMENDATION COULD BE MADE**

#### Voting Details

| Recommend do | suggest do | neutral | suggest not | recommend not | votes |
|--------------|------------|---------|-------------|---------------|-------|
| 2            | 9          | 5       | 0           | 0             | 16    |

---

### Potential Recommendation 4a

**“Protocols and/or efforts should be utilized to maintain IAP < 20 mmHg versus inattention to IAP”**

**SUGGESTION**

#### Voting Details

| Recommend do | suggest do | neutral | suggest not | recommend not | votes |
|--------------|------------|---------|-------------|---------------|-------|
| 5            | 6          | 1       | 0           | 1             | 16    |

---

### Final Recommendation 4

**(The previous suggestion was reworded to the following)**

**“Protocols and/or efforts should be utilized to avoid sustained IAH versus inattention to the IAP”**

**Suggestion**

### Voting Details

| Recommend do | suggest do | neutral | suggest not | recommend not | votes |
|--------------|------------|---------|-------------|---------------|-------|
| 13           | 3          | 0       | 0           | 0             | 14    |

### Suggestion 1

---

#### **Potential Recommendation**

**“Use of diuretics to mobilize fluids in hemodynamically stable patients.”**

**NO RECOMMENDATION COULD BE MADE**

### Voting Details

| Recommend do | suggest do | neutral | suggest not | recommend not | votes |
|--------------|------------|---------|-------------|---------------|-------|
| 3            | 0          | 7       | 0           | 6             | 16    |

---

#### **Potential Recommendation**

**“Use of renal replacement therapies to mobilize fluids in hemodynamically stable patients.”**

**NO RECOMMENDATION COULD BE MADE**

### Voting Details

| Recommend do | suggest do | neutral | suggest not | recommend not | votes |
|--------------|------------|---------|-------------|---------------|-------|
| 3            | 0          | 10      | 0           | 3             | 16    |

---

#### **Potential Recommendation**

**“Administration of albumin to mobilize fluids in hemodynamically stable patients.”**

**NO RECOMMENDATION COULD BE MADE**

### Voting Details

| Recommend do | suggest do | neutral | suggest not | recommend not | votes |
|--------------|------------|---------|-------------|---------------|-------|
| 4            | 0          | 11      | 0           | 1             | 16    |

---

### Suggestion

**“Use a protocol to try to avoid a positive cumulative fluid balance”**

### SUGGESTION

### Voting Details

| Recommend do | suggest do | neutral | suggest not | recommend not | votes |
|--------------|------------|---------|-------------|---------------|-------|
| 8            | 8          | 0       | 0           | 9             | 16    |

---

### Suggestion

**“Use an enhanced ratio of plasma to packed red blood cells during resuscitation from massive hemorrhage”**

### SUGGESTION

### Voting Details

| Recommend do | suggest do | neutral | suggest not | recommend not | votes |
|--------------|------------|---------|-------------|---------------|-------|
| 2            | 14         | 0       | 0           | 0             | 16    |

---

### Suggestion

**“Use percutaneous drainage to remove fluid in those with IAH/ACS when this is technically possible *compared to doing nothing*”**

## SUGGESTION

### Voting Details

| Recommend do | suggest do | neutral | suggest not | recommend not | votes |
|--------------|------------|---------|-------------|---------------|-------|
| 11           | 5          | 0       | 0           | 0             | 16    |

---

### Suggestion

**“Use percutaneous drainage to remove fluid in those with IAH/ACS when this is technically possible *compared to doing a decompressive laparotomy*”**

## SUGGESTION

### Voting Details

| Recommend do | suggest do | neutral | suggest not | recommend not | votes |
|--------------|------------|---------|-------------|---------------|-------|
| 6            | 5          | 3       | 2           | 0             | 16    |

---

### Recommendation

**“Use of decompressive laparotomy in patients with ACS”**

## RECCOMENDATION

### Voting Details

| Recommend do | suggest do | neutral | suggest not | recommend not | votes |
|--------------|------------|---------|-------------|---------------|-------|
| 15           | 1          | 0       | 0           | 0             | 16    |

---

### Suggestion

**“Use of the prophylactic open abdomen strategy for physiologically exhausted post-trauma patients”**

## SUGGESTION

### Voting Details

| Recommend do | suggest do | neutral  | suggest not | recommend not | votes     |
|--------------|------------|----------|-------------|---------------|-----------|
| <b>8</b>     | <b>6</b>   | <b>0</b> | <b>1</b>    | <b>0</b>      | <b>15</b> |

---

### Potential Recommendation

**“Use of the prophylactic open abdomen strategy for physiologically exhausted post-operative emergency non-trauma patients”**

### NO RECOMMENDATION COULD BE MADE

### Voting Details

| Recommend do | suggest do | neutral | suggest not | recommend not | votes |
|--------------|------------|---------|-------------|---------------|-------|
| 3            | 3          | 3       | 3           | 3             | 15    |

---

### Recommendation

**“In patients with severe intra-peritoneal contamination undergoing laparotomy for emergency surgery the routine or prophylactic use of the OA versus expectant IAP management is NOT suggested”**

### SUGGESTION NOT TO DO

### Voting Details

| Recommend do | suggest do | neutral | suggest not | recommend not | votes |
|--------------|------------|---------|-------------|---------------|-------|
| 0            | 1          | 4       | 7           | 3             | 15    |

---

**Potential Recommendation**

**“In critically ill patients with open abdomens component parts seperation should be routinely utilized to facilitate early acute fascial closure.”**

**NO RECOMMENDATION**

## Voting Details

| Recommend do | suggest do | neutral | suggest not | recommend not | votes |
|--------------|------------|---------|-------------|---------------|-------|
| 0            | 5          | 9       | 0           | 0             | 14    |

---

**Suggestion**

**“In patients critically ill patients with open abdomens biological meshes should be routinely utilized to facilitate early acute fascial closure.”**

**SUGGESTION NOT TO DO**

## Voting Details

| Recommend do | suggest do | neutral | suggest not | recommend not | votes |
|--------------|------------|---------|-------------|---------------|-------|
| 0            | 0          | 7       | 0           | 8             | 15    |

---

**Recommendation**

**“In patients critically ill patients with open abdomens that strategies utilizing negative pressure wound therapy should be used versus not. “**

**STRONG RECOMMENDATION**

## Voting Details

| Recommend do | suggest do | neutral | suggest not | recommend not | votes |
|--------------|------------|---------|-------------|---------------|-------|
| 11           | 4          | 0       | 0           | 0             | 15    |
