# Supplementary material for: Intra-abdominal hypertension and the abdominal compartment syndrome: updated consensus definitions and clinical practice guidelines from the World Society of the Abdominal Compartment Syndrome
Source: Springer Nature journal article supplement (doi:10.1007/s00134-013-2906-z), 2013-05-14

## Forest plot looking at the effect of a restrictive fluid regimen on mortality

Figure 4. Forest plot looking at the effect of a restrictive fluid regimen on mortality

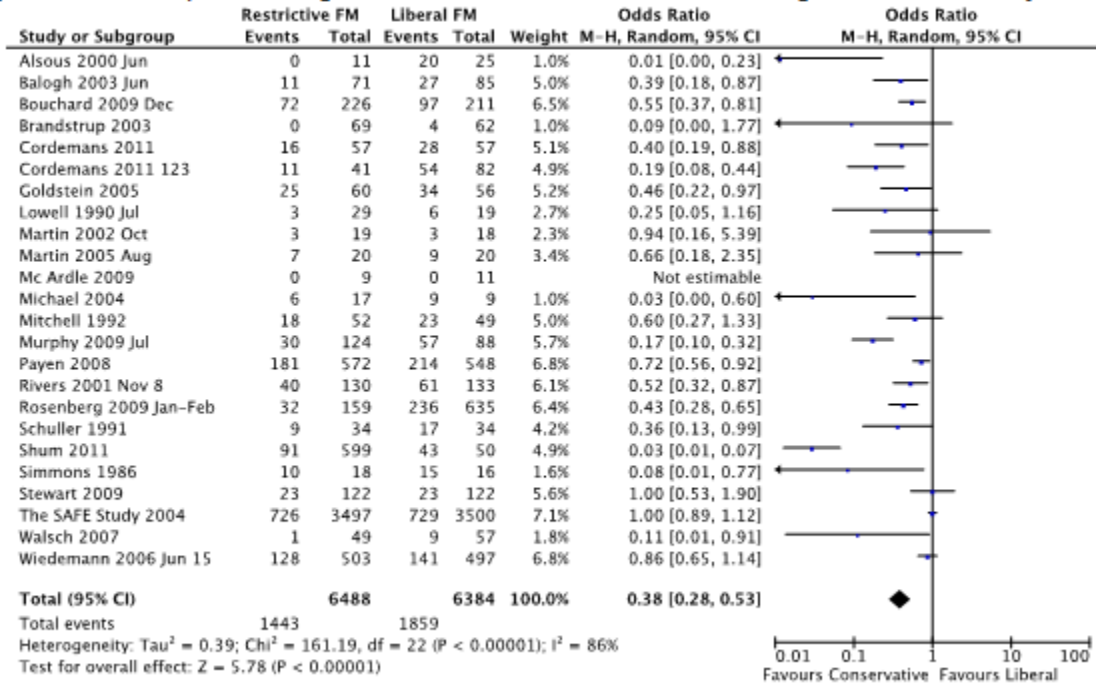

Supplement: MOESM36 [file 8122336]
