# Supplementary material for: Intra-abdominal hypertension and the abdominal compartment syndrome: updated consensus definitions and clinical practice guidelines from the World Society of the Abdominal Compartment Syndrome
Source: Springer Nature journal article supplement (doi:10.1007/s00134-013-2906-z), 2013-05-14

## Cumulative fluid balance and intra-abdominal hypertension

Table . Summary of studies looking at cumulative fluid balance after 1 week of ICU stay in patients with and without intra-abdominal hypertension

|                           | Cum FB<br>no IAH | SD     | N     | Cum FB<br>IAH | Sd     | N     | Delta FB       |
|---------------------------|------------------|--------|-------|---------------|--------|-------|----------------|
| <b>Cordemans 2012</b>     | 3690             | 6480   | 71    | 6812          | 9755   | 43    | <b>-3122</b>   |
| <b>Cordemans 2012</b>     | 5963             | 7066   | 98    | 9062          | 9014   | 25    | <b>-3099</b>   |
| <b>Dalfino 2008</b>       | 680              | 3040   | 86    | 3760          | 4500   | 37    | <b>-3080</b>   |
| <b>Malbrain 2005</b>      | 2877             | 5522   | 180   | 4190          | 7650   | 85    | <b>-1313</b>   |
| <b>Malbrain 2011</b>      | 4675             | 6771   | 271   | 6928          | 7758   | 237   | <b>-2253</b>   |
| <b>Mc Nelis 2002</b>      | 7000             | 3500   | 22    | 15900         | 7000   | 22    | <b>-8900</b>   |
| <b>Reintam 2008</b>       | 4429             | 1286   | 162   | 6571          | 2429   | 95    | <b>-2142</b>   |
| <b>Vidal 2008</b>         | 5800             | 7200   | 30    | 9000          | 10000  | 53    | <b>-3200</b>   |
| <b>mean Fluid Balance</b> | 4389,3           | 5108,1 | 920,0 | 7777,9        | 7263,3 | 597,0 | <b>-3388,6</b> |
| <b>Standard Deviation</b> | 1996,4           | 2220,0 |       | 3803,0        | 2625,0 |       | <b>2324,2</b>  |

### Forrest Plot

Panel A. Forest plot looking at cumulative fluid balance after 1 week of ICU stay in patients with and without intraabdominal hypertension

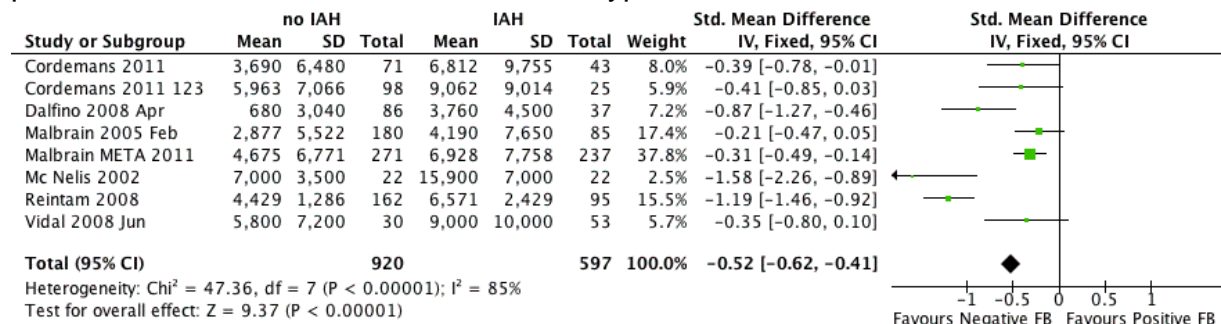

Panel B. Bar graph showing mean cumulative fluid balance after 1 week of ICU stay in patients with and without intra-abdominal hypertension

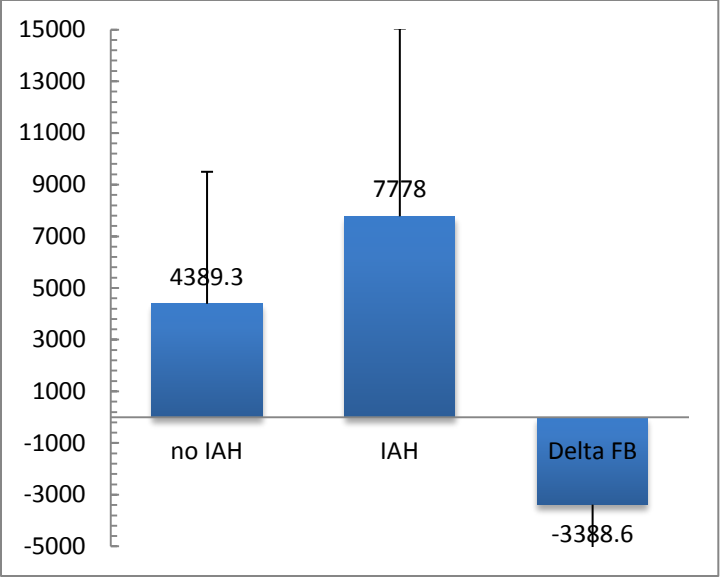

Supplement: MOESM38 [file 8122336]
